# Supplementary material
Source: PubMed Central journal article supplement (PMC2938121)
Supplement: supp_M110.000406_mcp.M110.000406-1.pdf [file supp_M110.000406_mcp.M110.000406-1.pdf]

## **SUPPLEMENTARY MATERIAL on “Networks inferred from biochemical data reveal profound differences in TLR and inflammatory signaling between normal and transformed hepatocytes”**

Leonidas G. Alexopoulos, Julio Saez-Rodriguez, Benjamin D. Cosgrove, Douglas A. Lauffenburger, and Peter K. Sorger

### **Contents:**

#### **FIGURES**

**Supplemental Figure 1.** Cytokine levels at 0, 3hr and 24hr after addition of ligand cues.

**Supplemental Figure 2.** Schematic of signaling pathways studied in this proposal.

**Supplemental Figure 3.** Evaluation of the performance of Multiple Linear Regression modeling by cross-correlation.

**Supplemental Figure 4.** Determining optimal concentrations of kinase inhibitors targeting Mek, PI3K, P38 and IKK.

**Supplemental Figure 5.** Evaluation of preparation-to-preparation and donor-to-donor variability

**Supplemental Figure 6.** Evaluation of hepatocyte purity using flow cytometry.

**Supplemental Figure 7.** Levels of NF- $\kappa$ B family members in hepatocytes and HCC cell lysates.

**Supplemental Figure 8.** Histograms of MLR weights.

#### **TABLES**

**Supplemental Table 1.** Subsets of data that used in DREAM3 and DREAM4 projects.

**Supplemental Table 2.** Identities of signals for CSR analysis.

**Supplemental Table 3.** Cytokines assayed using xMAP assays.

**Supplemental Table 4.** Expression levels of TLR receptors in hepatocytes and HCC cell lines

**Supplemental Figure 1.** Cytokine levels at 0, 3hr and 24hr after addition of ligand cues. In each column, one of seven small molecules kinase inhibitors were added, following the format of Figure 1. Red “X” denotes measurements that are not meaningful because they correspond to exogenously added ligand. Only non-zero cytokines were plotted except for IL1B, IL10, and TNF that are left for demonstrating the hepatocyte purity (see Supplementary Supplemental Figure 6b for additional information on hepatocyte purity).

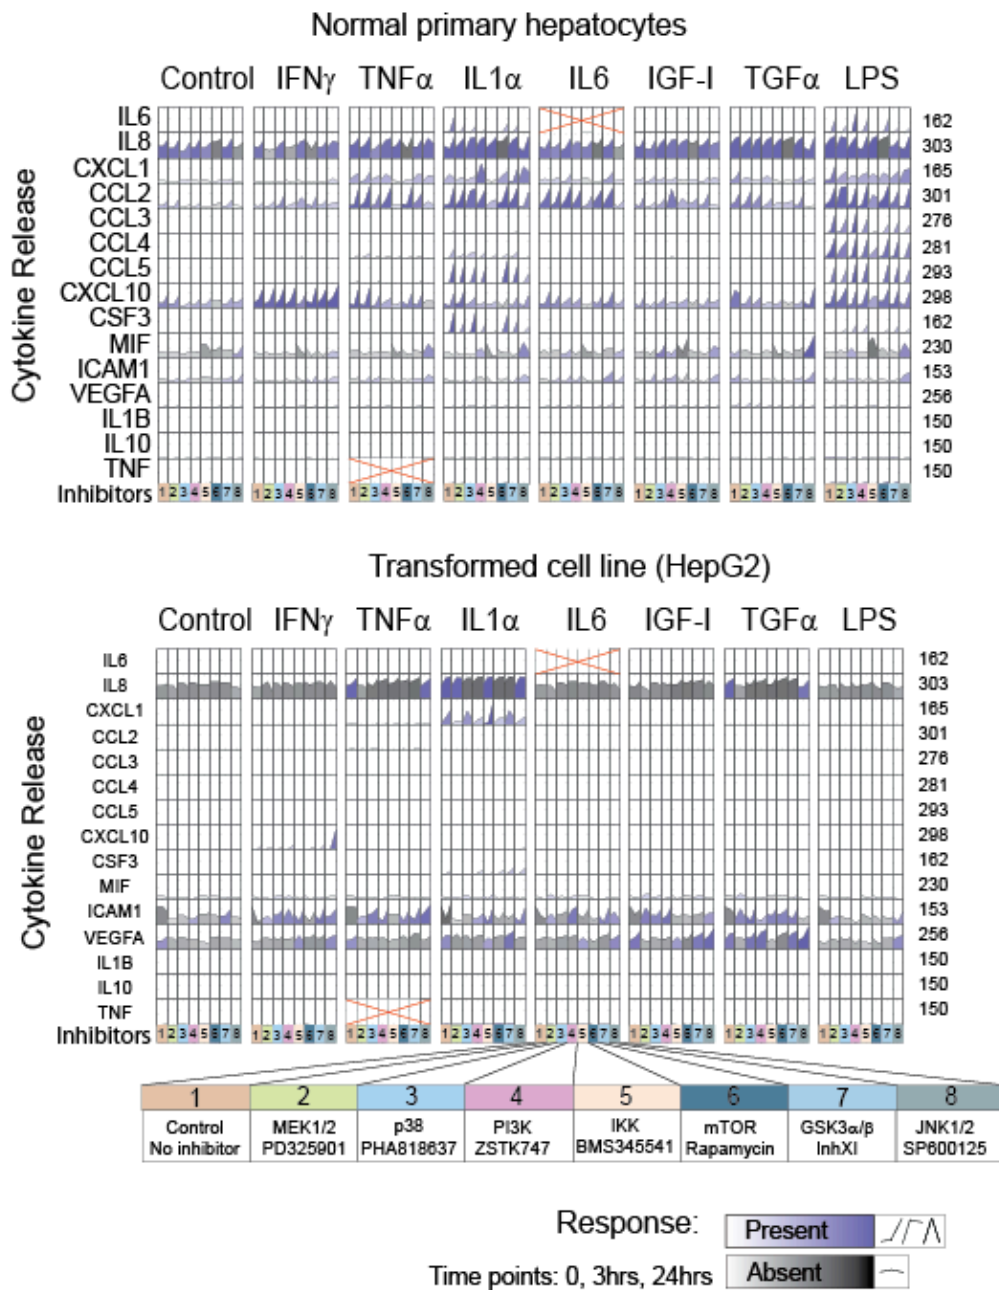

**Supplemental Figure 2.** Schematic of signaling pathways studied in this proposal. Pathways are redrawn from Ingenuity Systems.

### Cue-Signal-Response experimental approach

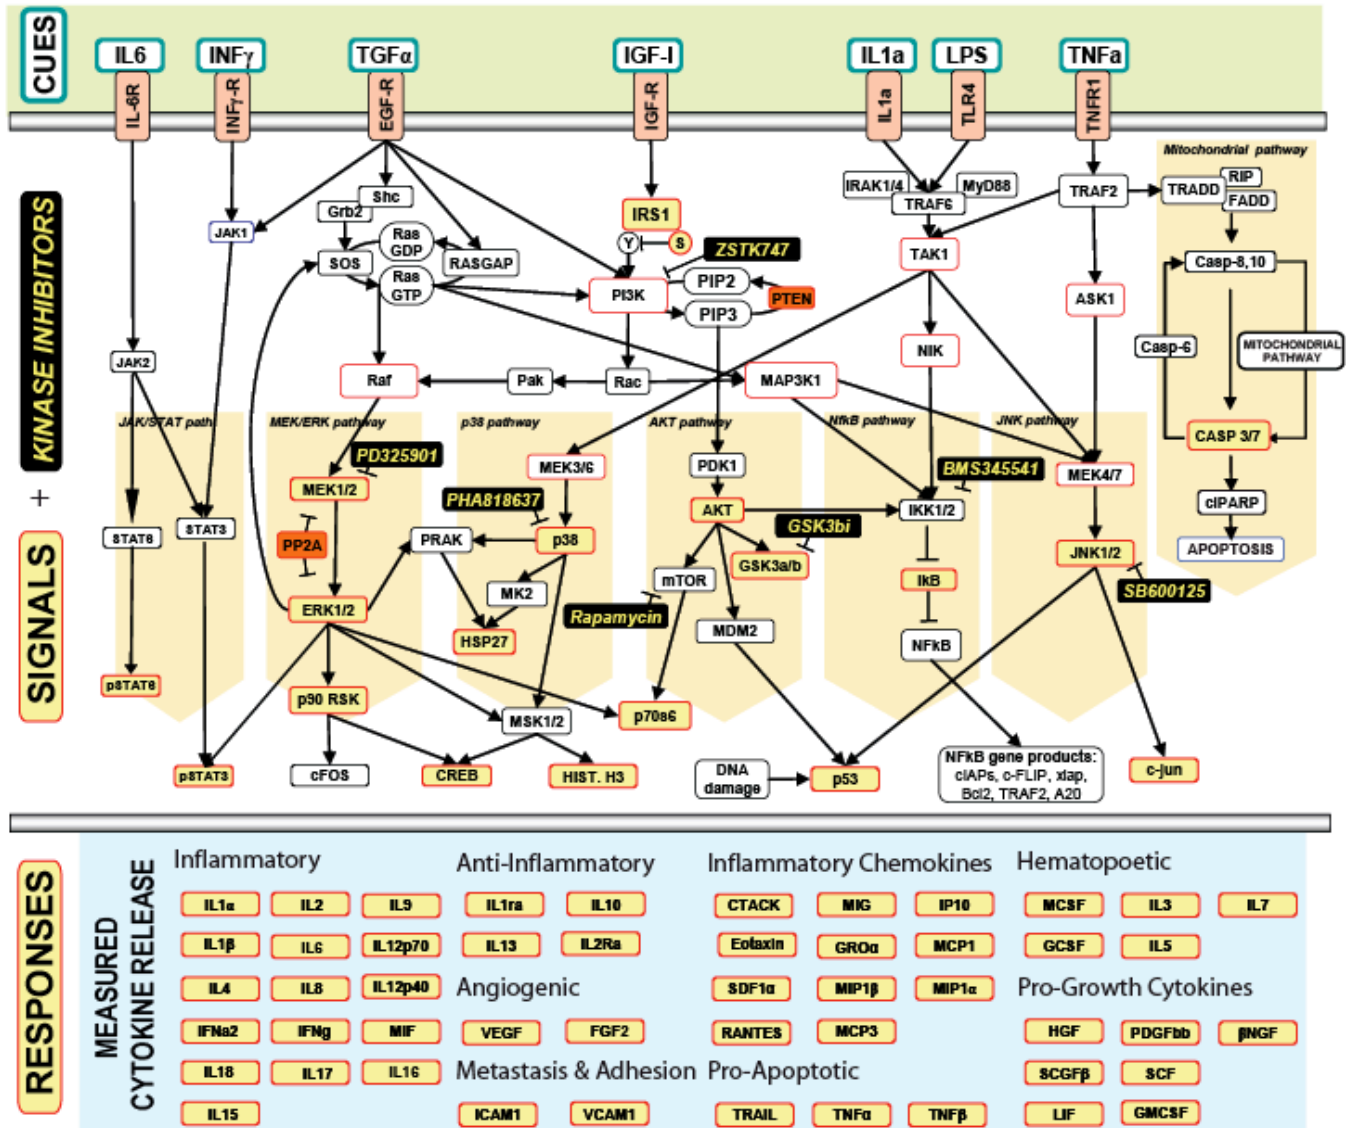

**Supplemental Figure 3.** Evaluation of the performance of Multiple Linear Regression modeling by cross-correlation analysis. Cross-correlation analysis was performed by omitting randomly ~15% of the original dataset (omitting 8 out of the 64 cases in each cell type), calculate the correlation coefficients from the remaining ~85% of the data, and then attempting to predict the omitted data. The procedure was repeated iteratively 100 times with different omitted cases each time.

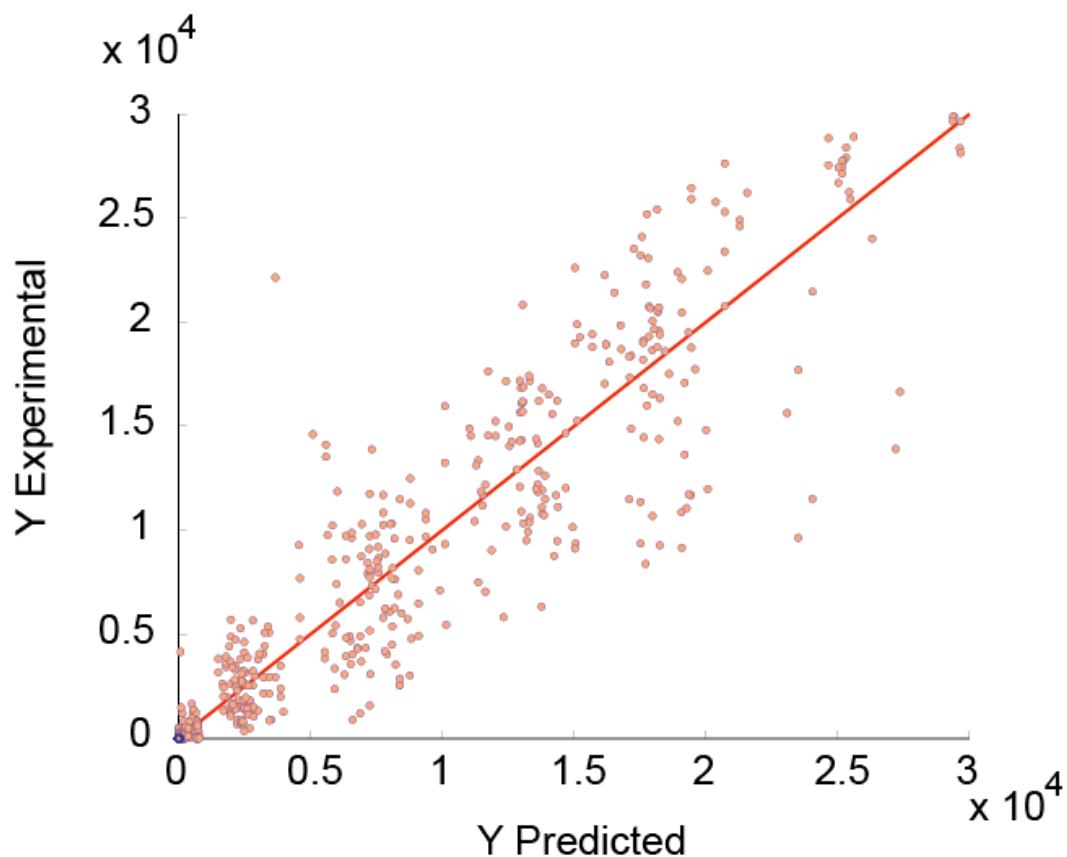

**Supplemental Figure 4.** Determining optimal concentrations of kinase inhibitors targeting Mek, PI3K, P38 and IKK. Experiments were performed in HepG2 cell lines; vertical axes represent fluorescence units as determined using the relevant xMAP assays.

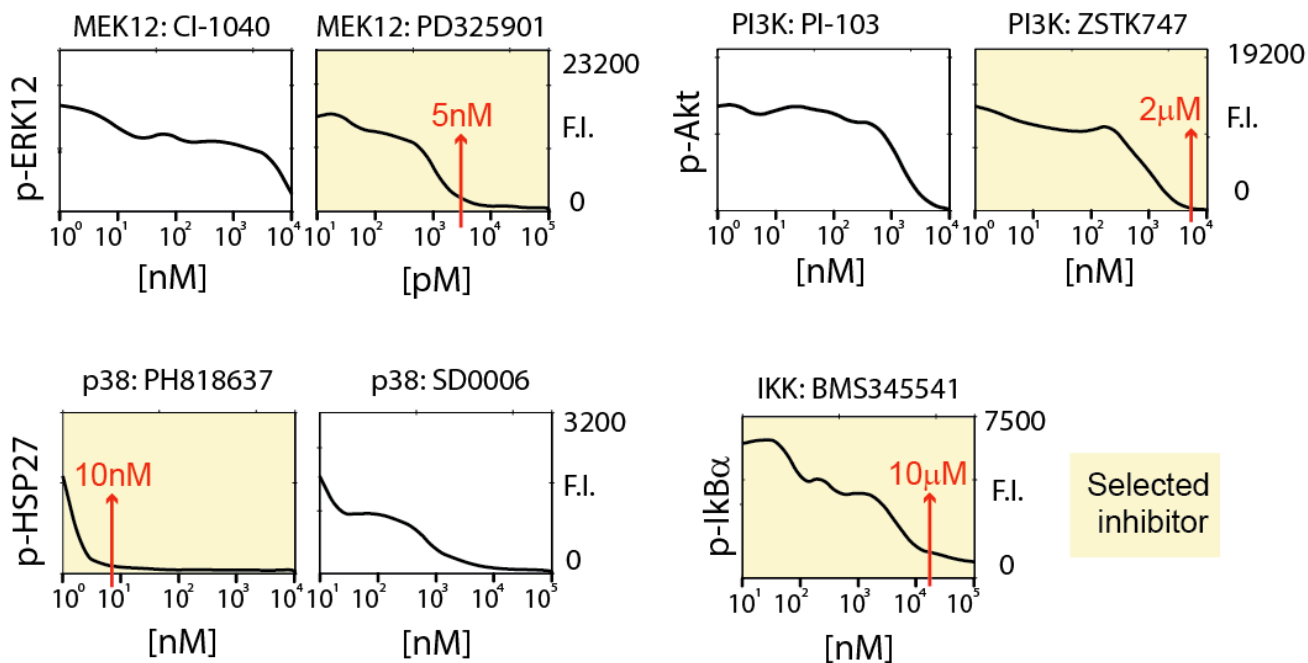

**Supplemental Figure 5.** Evaluation of preparation-to-preparation and donor-to-donor variability. We evaluated variation of cytokine levels in supernatants from HepG2 cells at different passage numbers and from hepatocytes from different donors. Successive cytokine measurements 24 hours after ligand addition are arrayed along the horizontal axis in three successive blocks representing baseline, IL1 $\alpha$  and LPS-stimulation. The intensity of the signal is depicted by the height of the vertical axis. Replicate assays (replicated 1, 2, and 3) of a single biological sample are shown as small triangles, squares and circles; the typical coefficient of variation for such repeat measurements was 0.08. Data from passage 11 (upper panel) and passage 16 (lower panel) HepG2 cells correlated with  $R^2=0.91$ . Large open circles highlight selected cytokines that were observed to vary the most (MIF) or the least (IL8) with passage number. (b) Analysis similar to that in (a) but for hepatocytes from two human donors. Large circles highlight CCL5, which varied dramatically from donor to donor, and IL8, which did not. Data from two donors correlated with  $R^2=0.83$ .

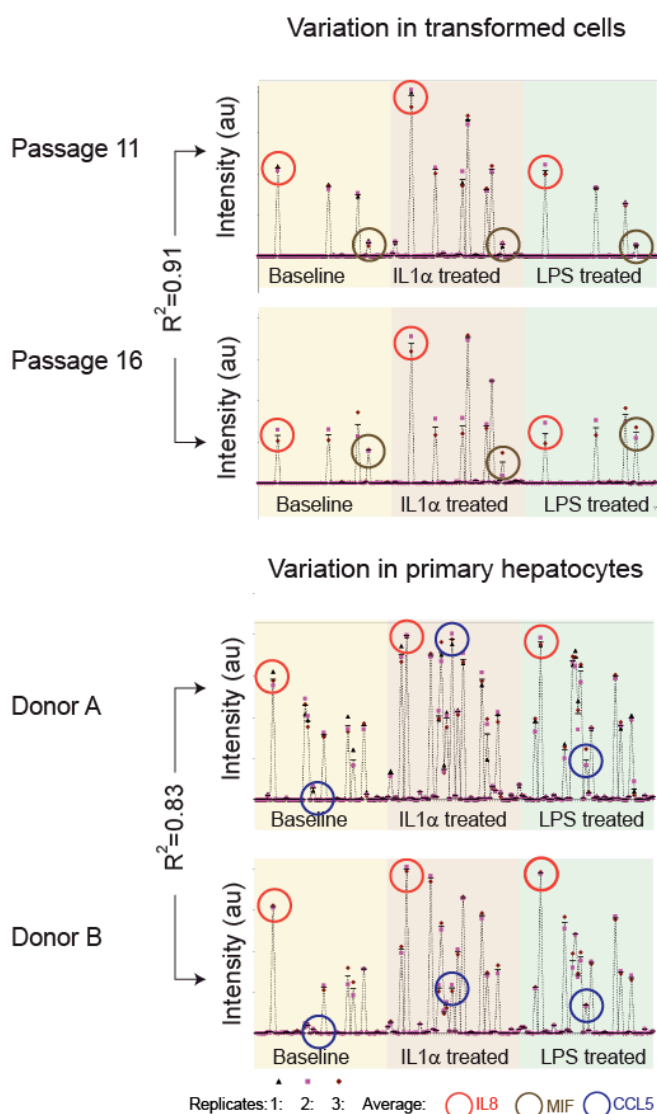

**Supplemental Figure 6.** Evaluation of hepatocyte purity. **(a)** To assess the purity of hepatocyte preparations we used flow cytometry with biomarkers specific for hepatocytes (albumin and cytokeratin-18), bile epithelial cells (cytokeratin-19), liver endothelial cells (CD31), Kupffer cells (CD163), and stellate cells (GFAP) and analyzed by flow cytometry. Hepatocyte isolations showed levels of contaminating cells to be very low. **(b)** To ensure that contamination with Kupffer cells was not a confounding factor in interpreting cytokine secretion results we assayed for responses characteristic of Kupffer cells: LPS and IFN $\gamma$  induced secretion of TNF $\alpha$ , IL-1 $\beta$ , and IL-10. Bar graph show results of an activity-based assay for Kupffer cells in which LPS or IFN $\gamma$ -induced cytokine levels were measured for hepatocyte preparations and a U937 macrophage cell line served as a positive control. Induced secretion of TNF $\alpha$ , IL1 $\beta$  and IL10 typical of Kupffer cells was observed in U937 controls and its absence in hepatocyte preparations is consistent with flow cytometry data showing very few Kupffer cells to be present.

Purity of Hepatocyte isolation

a. FACS analysis

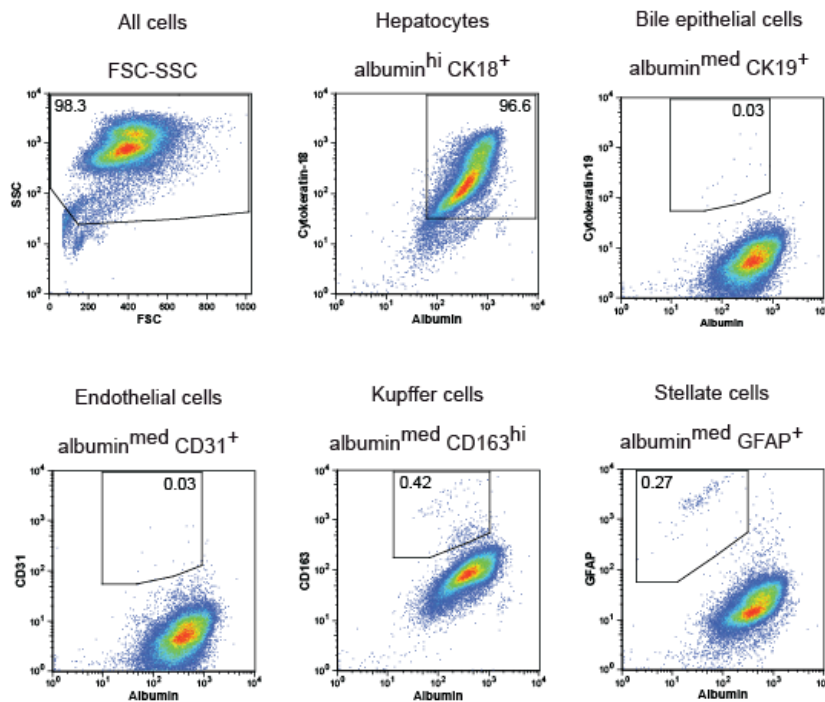

b. Macrophage biomarkers

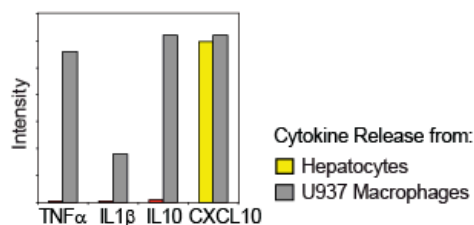

**Supplemental Figure 7.** Levels of NF- $\kappa$ B family members in hepatocytes and HCC cell lysates.

Immunoblotting was used to identify NF- $\kappa$ B family members p105, c-Rel, p65, and p50 in four HCC cell lines and primary hepatocytes (as indicated). GAPDH serves as a loading control.

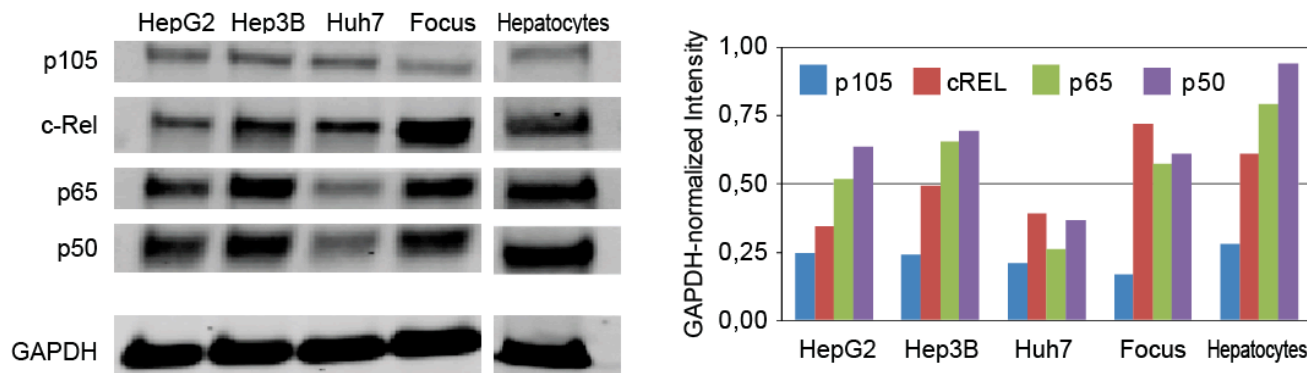



**Supplemental Figure 8.** Histograms of MLR weights for regression of signals against stimuli (upper panels) and signals against cytokines (lower panels). The blue bars represent the 25% strongest weights, which are plotted in Figure 3c-d.

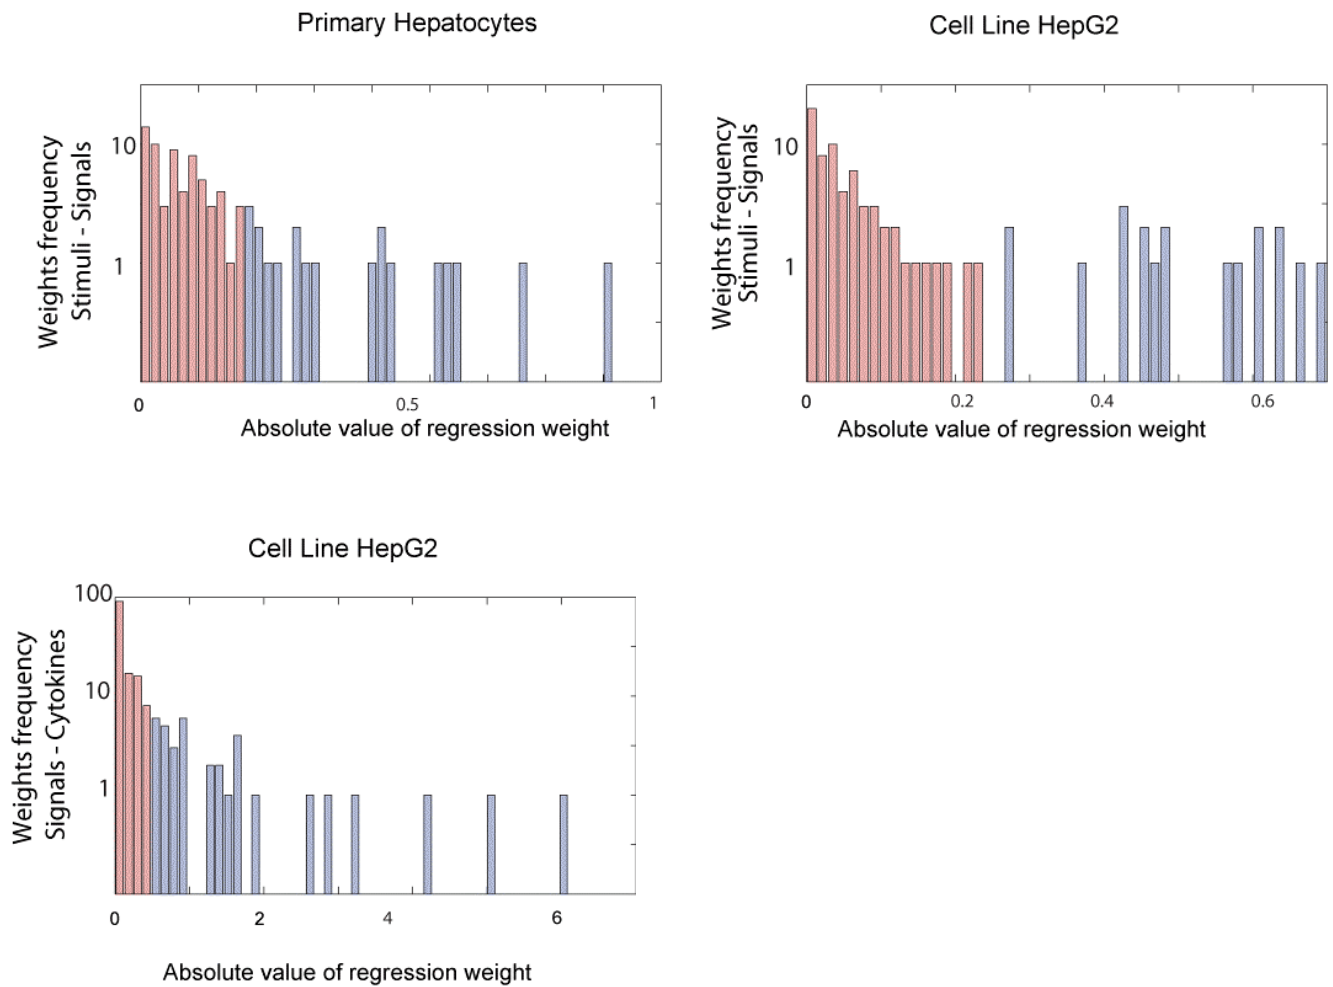

**Supplemental Table 1.** Subsets of data contained in this manuscript used in DREAM3 and DREAM4 competitions. [http://wiki.c2b2.columbia.edu/dream/index.php/The\\_DREAM\\_Project](http://wiki.c2b2.columbia.edu/dream/index.php/The_DREAM_Project)

| <b>Cell Type</b> | <b>Data type</b> | <b>Dream 3 Project</b> | <b>Dream 4 Project</b> | <b>Current Manuscript</b> |
|------------------|------------------|------------------------|------------------------|---------------------------|
| Primary Human    | Phosphoproteins  | 80%                    | X                      | full set                  |
| Primary Human    | Cytokine Release | 80%                    | X                      | full set                  |
| HCC- HepG2       | Phosphoproteins  | 80%                    | 30%                    | full set                  |
| HCC- HepG2       | Cytokine Release | 80%                    | X                      | full set                  |
| HCC- Huh7        | Cytokine Release | X                      | X                      | full set                  |
| HCC- Focus       | Cytokine Release | X                      | X                      | full set                  |
| HCC- Hep3B       | Cytokine Release | X                      | X                      | full set                  |

**Supplemental Table 2.** Identities of signals for CSR analysis. Intracellular signals assayed using a Luminex 200 system from 50 $\mu$ l of whole cell extract prepared from a single well of a 96 well plate. Protocols were as described by the bead manufacturer BioRad (Hercules, CA).

| <b>A: xMAP Assays</b>                   |
|-----------------------------------------|
| p-IRS-1 (Ser636/Ser639)                 |
| p-Akt (Ser473)                          |
| p-MEK1 (Ser217/Ser221)                  |
| p-ERK1/2 (Thr202/Tyr204, Thr185/Tyr187) |
| p-p90RSK (Thr359/Ser363)                |
| p-CREB (Ser133)                         |
| p-p70 S6 kinase (Thr421/Ser424)         |
| p-p38 MAPK (Thr180/Tyr182)              |
| p-HSP27 (Ser78)                         |
| p-I $\kappa$ B- $\alpha$ (Ser32/Ser36)  |
| p-JNK (Thr183/Tyr185)                   |
| p-c-Jun (Ser63)                         |
| p-p53 (Ser15)                           |
| p-GSK-3 $\alpha$ / $\beta$ (Ser21/Ser9) |
| p-Histone H3 (Ser10)                    |
| p-STAT3 (Tyr705)                        |
| p-STAT6 (Tyr641)                        |

**Supplemental Table 3.** Cytokines assayed using xMAP assays. 50 cytokines were measured using a Luminex 200 system from 100  $\mu$ l of supernatant from a single well of a 96 well plate following protocols provided by the bead manufacturer (Bio-Rad, Hercules CA).

| <b>Cytokine xMAP assays</b> |                                          |              |                                          |
|-----------------------------|------------------------------------------|--------------|------------------------------------------|
| IL1A                        | interleukin-1 $\alpha$                   | CXCL1        | chemokine (C-X-C motif) ligand 1         |
| IL1RA                       | interleukin-1 receptor antagonist        | CCL2         | chemokine (C-C motif) ligand 2           |
| IL1B                        | interleukin-1 $\beta$                    | CCL3         | chemokine (C-C motif) ligand 3           |
| IL1-10,13,15-18             | interleukin-2 to 10, 13, and 15 to 18    | CCL4         | chemokine (C-C motif) ligand 4           |
| IL2RA                       | interleukin-2 receptor, $\alpha$         | CCL5         | chemokine (C-C motif) ligand 5           |
| IL12A                       | interleukin-12 p70 heterodimer           | CCL7         | chemokine (C-C motif) ligand 7           |
| IL12B                       | interleukin-12B p40                      | CXCL9        | chemokine (C-X-C motif) ligand 9         |
| IFNA2                       | interferon- $\alpha$ 2                   | CXCL10       | chemokine (C-X-C motif) ligand 10        |
| IFNG                        | interferon- $\gamma$                     | CCL11        | chemokine (C-C motif) ligand 11          |
| MIF                         | macrophage migration inhibitory factor   | CXCL12       | chemokine (C-X-C motif) ligand 12        |
| ICAM1                       | intercellular adhesion molecule-1 (CD54) | CCL27        | chemokine (C-C motif) ligand 27          |
| VCAM1                       | vascular cell adhesion molecule-1        | TRAIL        | tumor necrosis factor, member 10         |
| VEGFA                       | vascular endothelial growth factor A     | TNF $\alpha$ | tumor necrosis factor, member 2          |
| FGF2                        | fibroblast growth factor 2 (basic)       | TNF $\beta$  | lymphotoxin alpha, member 1              |
| CSF1                        | colony stimulating factor 1              | CLEC11A      | C-type lectin domain family 11, member A |
| CSF3                        | colony stimulating factor 3              | KITLG        | KIT ligand                               |
| HGF                         | hepatocyte growth factor                 | LIF          | leukemia inhibitory factor               |
| PDGFB                       | platelet-derived growth factor $\beta$   | CSF2         | colony stimulating factor 2              |
| NGF                         | nerve growth factor ( $\beta$ )          |              |                                          |

**Supplemental Table 4.** Expression levels of TLR receptors and downstream proteins in hepatocytes vs HCC cell. PCR Arrays by SABiosciences were used as instructed by the vendor. Green background denotes overexpression in primary hepatocytes whereas red background denotes overexpression in HCC cells. The proteins have been grouped according to their function and ranked from “highly expressed in hepatocytes” to “highly expressed in HCC cells”. The first 4 data rows present gene expression levels (number of cell cycle where the gene expression level is detectable: CT-cycle threshold), whereas the next 4 rows (with red/green color in background) are difference of cell cycles between the 4 HCC cell types and hepatocytes normalized to the Actin Beta housekeeping gene ( $\Delta\Delta CT$ ). As a general guideline, 1 unit corresponds to what corresponds to the  $\log_2$  fold-difference in mRNA levels, The “Average” row contains the average normalized gene expression levels between hepatocytes and HCC cells. Expression level of TLR in all HCC cell lines are significantly lower when compared to hepatocytes, but differences in RNA levels do not necessarily correlate with changes in protein levels (de Sousa Abreu et al., *Mol. Biosystems*, 5(12):1512-26, 2009).

|                               | ALL CELL TYPES                   |       |      |       | HCC vs. HEPATOCYTES                                 |       |      |       | Average |      |                                                                    |
|-------------------------------|----------------------------------|-------|------|-------|-----------------------------------------------------|-------|------|-------|---------|------|--------------------------------------------------------------------|
|                               | Hepatocytes                      | HepG2 | HUH7 | FOCUS | Hep3B                                               | HepG2 | HUH7 | FOCUS |         |      | Hep3B                                                              |
|                               | Expression levels [cycle number] |       |      |       | Normalized gene expression levels [HCC-Hepatocytes] |       |      |       |         |      |                                                                    |
| <b>RECEPTORS</b>              |                                  |       |      |       |                                                     |       |      |       |         |      |                                                                    |
| TLR2                          | 25,3                             | 30,2  | 32,9 | 36,6  | 21,5                                                | 4,8   | 7,7  | 10,6  | 7,9     | 7,75 | Toll-like receptor 2                                               |
| TLR3                          | 24,5                             | 31,2  | 31,5 | 29,8  | 21,6                                                | 6,6   | 7,2  | 4,1   | 8,9     | 6,68 | Toll-like receptor 3                                               |
| TLR1                          | 25,1                             | 31,6  | 32,7 | 31,7  | 19,5                                                | 6,4   | 7,8  | 5,2   | 5,2     | 6,13 | Toll-like receptor 1                                               |
| TLR4                          | 26,3                             | 31,0  | 32,3 | 32,0  | 21,5                                                | 4,7   | 6,2  | 4,4   | 7,0     | 5,56 | Toll-like receptor 4                                               |
| TLR8                          | 29,3                             | 32,0  | 31,4 | 35,4  | 22,6                                                | 2,7   | 2,2  | 5,2   | 5,6     | 3,91 | Toll-like receptor 8                                               |
| TLR5                          | 28,8                             | 31,6  | 30,6 | 34,9  | 21,0                                                | 2,9   | 2,0  | 5,3   | 3,8     | 3,48 | Toll-like receptor 5                                               |
| TLR10                         | 30,4                             | 32,5  | 32,5 | 34,8  | 21,1                                                | 2,0   | 2,2  | 3,4   | 2,3     | 2,46 | Toll-like receptor 10                                              |
| CD180                         | 27,7                             | 30,3  | 30,0 | 27,5  | 21,1                                                | 2,6   | 2,4  | -1,1  | 4,9     | 2,19 | CD180 molecule                                                     |
| TLR7                          | 31,8                             | 33,2  | 31,6 | 34,8  | 23,3                                                | 1,5   | 0,0  | 1,6   | 4,2     | 1,81 | Toll-like receptor 7                                               |
| TLR9                          | 29,7                             | 30,4  | 30,7 | 32,8  | 20,4                                                | 0,8   | 1,4  | 2,4   | 2,1     | 1,65 | Toll-like receptor 9                                               |
| TLR6                          | 28,2                             | 28,9  | 30,3 | 26,7  | 19,7                                                | 0,8   | 2,4  | -2,3  | 2,5     | 0,84 | Toll-like receptor 6                                               |
| TNFRSF1A                      | 22,7                             | 23,2  | 23,6 | 22,1  | 15,2                                                | 0,4   | 1,0  | -2,0  | 1,0     | 0,11 | Tumor necrosis factor receptor superfamily, member 1A              |
| NR2C2                         | 26,0                             | 24,2  | 24,2 | 25,8  | 16,6                                                | -     | -    | -1,7  | -0,2    | 1,36 | Nuclear receptor subfamily 2, group C, member 2                    |
| <b>EXTRACELLULAR ADAPTORS</b> |                                  |       |      |       |                                                     |       |      |       |         |      |                                                                    |
| CLEC4E                        | 26,3                             | 31,6  | 31,6 | 34,8  | 21,6                                                | 5,5   | 5,7  | 7,3   | 7,4     | 6,46 | C-type lectin domain family 4, member E                            |
| CD14                          | 21,8                             | 26,0  | 26,2 | 33,0  | 18,3                                                | 4,2   | 4,5  | 9,8   | 6,6     | 6,26 | CD14 molecule                                                      |
| CD86                          | 27,1                             | 30,8  | 31,0 | 32,5  | 21,1                                                | 3,8   | 4,2  | 4,7   | 5,6     | 4,55 | CD86 molecule                                                      |
| LY86                          | 29,0                             | 30,3  | 31,1 | 34,9  | 20,9                                                | 1,2   | 2,3  | 4,8   | 3,4     | 2,90 | Lymphocyte antigen 86                                              |
| CD80                          | 28,2                             | 29,5  | 30,6 | 30,1  | 20,4                                                | 1,3   | 2,6  | 0,7   | 3,5     | 2,03 | CD80 molecule                                                      |
| SIGIRR                        | 26,4                             | 27,1  | 30,5 | 29,9  | 17,2                                                | 0,7   | 4,2  | 2,0   | 0,4     | 1,81 | Single immunoglobulin and toll-interleukin 1 receptor (TIR) domain |
| LY96                          | 28,5                             | 27,3  | 31,9 | 27,1  | 21,5                                                | -     | 3,5  | -2,6  | 4,7     | 1,09 | Lymphocyte antigen 96                                              |

|                               |      |      |      |      |      | 1,3 |     |      |      |  |      |                                                                                    |
|-------------------------------|------|------|------|------|------|-----|-----|------|------|--|------|------------------------------------------------------------------------------------|
| <b>INTRACELLULAR ADAPTORS</b> |      |      |      |      |      |     |     |      |      |  |      |                                                                                    |
| <b>TICAM2</b>                 | 24,5 | 27,6 | 26,1 | 26,5 | 18,3 | 3,1 | 1,7 | 0,6  | 4,0  |  | 2,33 | Toll-like receptor adaptor molecule 2                                              |
| <b>TICAM1</b>                 | 22,3 | 24,9 | 24,5 | 24,2 | 15,3 | 2,5 | 2,4 | 0,4  | 1,6  |  | 1,71 | Toll-like receptor adaptor molecule 1                                              |
| <b>TIRAP</b>                  | 24,9 | 26,3 | 26,0 | 27,5 | 17,7 | 1,3 | 1,2 | 1,3  | 2,7  |  | 1,61 | Toll-interleukin 1 receptor (TIR) domain containing adaptor protein                |
| <b>TRAF6</b>                  | 24,0 | 25,0 | 25,1 | 26,4 | 16,9 | 1,1 | 1,4 | 1,1  | 2,4  |  | 1,48 | TNF receptor-associated factor 6                                                   |
| <b>MYD88</b>                  | 22,6 | 22,7 | 23,4 | 25,3 | 15,9 | 0,3 | 1,2 | 1,5  | 2,5  |  | 1,34 | <i>Myeloid differentiation primary response gene (88)</i>                          |
| <b>TOLLIP</b>                 | 25,4 | 25,5 | 26,2 | 27,4 | 17,0 | 0,1 | 1,0 | 0,6  | 1,1  |  | 0,66 | Toll interacting protein                                                           |
| <b>ECSIT</b>                  | 23,8 | 22,8 | 22,8 | 23,7 | 16,2 | -   | -   | -0,9 | 1,7  |  | 0,15 | ECSIT homolog (Drosophila)                                                         |
| <b>PELI1</b>                  | 23,2 | 22,7 | 22,7 | 24,2 | 13,4 | -   | -   | -0,2 | -2,0 |  | 0,69 | Pellino homolog 1 (Drosophila)                                                     |
| <b>CYTOKINES</b>              |      |      |      |      |      |     |     |      |      |  |      |                                                                                    |
| <b>IL8</b>                    | 20,1 | 26,3 | 26,3 | 28,4 | 16,7 | 6,1 | 6,4 | 7,2  | 5,9  |  | 6,39 | Interleukin 8                                                                      |
| <b>CCL2</b>                   | 24,4 | 30,3 | 30,8 | 27,3 | 20,9 | 6,1 | 6,7 | 2,0  | 8,1  |  | 5,70 | Chemokine (C-C motif) ligand 2                                                     |
| <b>CXCL10</b>                 | 27,0 | 31,6 | 31,0 | 34,2 | 19,9 | 4,8 | 4,3 | 6,3  | 4,0  |  | 4,84 | Chemokine (C-X-C motif) ligand 10                                                  |
| <b>IL1B</b>                   | 25,1 | 27,8 | 29,5 | 24,4 | 20,7 | 2,8 | 4,7 | -1,9 | 7,0  |  | 3,11 | Interleukin 1, beta                                                                |
| <b>IL10</b>                   | 30,7 | 32,5 | 33,0 | 36,4 | 21,9 | 1,8 | 2,4 | 4,8  | 3,1  |  | 3,00 | Interleukin 10                                                                     |
| <b>IFNG</b>                   | 31,4 | 32,2 | 33,1 | 36,4 | 22,3 | 0,8 | 1,9 | 4,4  | 3,1  |  | 2,56 | Interferon, gamma                                                                  |
| <b>IFNA1</b>                  | 29,8 | 31,3 | 32,0 | 33,8 | 20,9 | 1,7 | 2,6 | 2,8  | 2,9  |  | 2,49 | Interferon, alpha 1                                                                |
| <b>IL2</b>                    | 31,6 | 32,7 | 32,3 | 37,2 | 22,6 | 1,1 | 0,9 | 4,3  | 3,3  |  | 2,40 | Interleukin 2                                                                      |
| <b>CSF2</b>                   | 31,1 | 32,8 | 33,4 | 32,7 | 22,7 | 1,6 | 2,5 | 0,2  | 3,9  |  | 2,03 | Colony stimulating factor 2 (granulocyte-macrophage)                               |
| <b>LTA</b>                    | 30,8 | 31,5 | 32,2 | 32,9 | 21,6 | 0,9 | 1,7 | 1,4  | 2,7  |  | 1,66 | Lymphotoxin alpha (TNF superfamily, member 1)                                      |
| <b>IFNB1</b>                  | 30,4 | 31,4 | 32,2 | 31,7 | 21,6 | 1,0 | 1,9 | 0,0  | 3,0  |  | 1,46 | Interferon, beta 1, fibroblast                                                     |
| <b>TNF</b>                    | 30,5 | 31,0 | 31,5 | 33,8 | 21,0 | 0,4 | 1,2 | 1,9  | 1,9  |  | 1,34 | Tumor necrosis factor (TNF superfamily, member 2)                                  |
| <b>CSF3</b>                   | 31,6 | 30,7 | 31,9 | 30,1 | 21,2 | 0,9 | 0,5 | -2,3 | 1,2  |  | 0,38 | Colony stimulating factor 3 (granulocyte)                                          |
| <b>IL6</b>                    | 30,3 | 31,1 | 31,1 | 25,0 | 20,6 | 0,7 | 0,9 | -6,6 | 1,5  |  | 0,85 | Interleukin 6 (interferon, beta 2)                                                 |
| <b>IL12A</b>                  | 29,3 | 28,5 | 28,1 | 27,0 | 19,3 | 0,8 | 0,9 | -3,6 | 0,7  |  | 1,16 | Interleukin 12A                                                                    |
| <b>IL1A</b>                   | 28,9 | 27,0 | 29,0 | 23,1 | 19,3 | 2,0 | 0,3 | -7,0 | 1,0  |  | 1,93 | Interleukin 1, alpha                                                               |
| <b>INTRACELLULAR SIGNALS</b>  |      |      |      |      |      |     |     |      |      |  |      |                                                                                    |
| <b>HSPA1A</b>                 | 17,4 | 23,1 | 23,7 | 26,4 | 18,0 | 5,7 | 6,5 | 7,7  | 10,7 |  | 7,65 | Heat shock 70kDa protein 1A                                                        |
| <b>FOS</b>                    | 22,1 | 25,9 | 26,5 | 23,8 | 18,0 | 3,9 | 4,6 | 0,5  | 5,9  |  | 3,71 | V-fos FBJ murine osteosarcoma viral oncogene homolog                               |
| <b>JUN</b>                    | 18,8 | 22,0 | 22,7 | 21,0 | 14,2 | 3,2 | 4,2 | 1,2  | 3,5  |  | 3,01 | Jun oncogene                                                                       |
| <b>MAPK8</b>                  | 23,6 | 24,2 | 24,9 | 27,0 | 18,1 | 0,6 | 1,6 | 2,1  | 4,7  |  | 2,24 | Mitogen-activated protein kinase 8 (prostaglandin G/H synthase and cyclooxygenase) |
| <b>PTGS2</b>                  | 30,4 | 31,9 | 32,5 | 33,9 | 20,2 | 1,5 | 2,3 | 2,9  | 0,9  |  | 1,91 |                                                                                    |
| <b>SARM1</b>                  | 26,2 | 27,8 | 29,2 | 27,7 | 17,7 | 1,7 | 3,3 | 0,9  | 1,5  |  | 1,85 | Sterile alpha and TIR motif containing 1                                           |
| <b>PPARA</b>                  | 23,0 | 22,4 | 24,2 | 25,9 | 17,3 | 0,3 | 1,6 | 1,8  | 4,2  |  | 1,81 | Peroxisome proliferative activated receptor, alpha                                 |
| <b>MAP2K3</b>                 | 22,2 | 22,6 | 23,1 | 24,8 | 16,5 | 0,5 | 1,2 | 1,5  | 3,8  |  | 1,74 | Mitogen-activated protein kinase kinase 3                                          |
| <b>RIPK2</b>                  | 22,0 | 23,5 | 23,8 | 23,9 | 15,8 | 1,4 | 2,0 | 0,6  | 2,6  |  | 1,64 | Receptor-interacting serine-threonine kinase 2                                     |
| <b>BTK</b>                    | 30,3 | 32,5 | 31,4 | 28,8 | 22,0 | 2,3 | 1,3 | -2,8 | 3,8  |  | 1,13 | Bruton agammaglobulinemia tyrosine kinase                                          |
| <b>EIF2AK2</b>                | 23,1 | 22,7 | 24,8 | 23,3 | 16,7 | 0,2 | 2,0 | -0,7 | 3,1  |  | 1,03 | Eukaryotic translation initiation factor 2-alpha kinase 2                          |
| <b>HSPD1</b>                  | 17,7 | 17,2 | 18,5 | 19,9 | 12,9 | 0,5 | 1,0 | 0,8  | 2,7  |  | 1,01 | Heat shock 60kDa protein 1 (chaperonin)                                            |
| <b>MAP4K4</b>                 | 22,9 | 20,8 | 22,9 | 26,2 | 17,0 | 2,1 | 0,3 | 2,0  | 3,6  |  | 0,95 | Mitogen-activated protein kinase kinase kinase 4                                   |
| <b>MAPK8IP3</b>               | 23,9 | 23,4 | 24,3 | 24,5 | 17,0 | 0,4 | 0,8 | -0,2 | 2,7  |  | 0,71 | Mitogen-activated protein kinase 8 interacting protein 3                           |
| <b>MAP2K4</b>                 | 24,3 | 24,0 | 24,5 | 26,1 | 16,5 | 0,3 | 0,4 | 0,7  | 1,5  |  | 0,58 | Mitogen-activated protein kinase kinase 4                                          |

|                             |      |      |      |      |      |   |     |     |      |      |      |                                                                                     |
|-----------------------------|------|------|------|------|------|---|-----|-----|------|------|------|-------------------------------------------------------------------------------------|
| <b>CASP8</b>                | 27,0 | 26,4 | 26,9 | 27,9 | 18,3 | - | 0,7 | 0,0 | 0,2  | 1,4  | 0,21 | Caspase 8, apoptosis-related cysteine peptidase                                     |
| <b>FADD</b>                 | 22,7 | 22,9 | 21,9 | 23,4 | 14,6 | - | 0,3 | 0,5 | 0,0  | 0,3  | 0,04 | Fas (TNFRSF6)-associated via death domain                                           |
| <b>MAP3K7IP1</b>            | 24,3 | 23,6 | 23,8 | 25,5 | 16,1 | - | 0,7 | 0,3 | -0,1 | 0,9  | 0,02 | Mitogen-activated protein kinase kinase kinase 7 interacting protein 1              |
| <b>PRKRA</b>                | 28,4 | 26,6 | 27,1 | 29,5 | 19,0 | - | 1,6 | 0,8 | 0,0  | 1,3  | 0,29 | Protein kinase, interferon-inducible double stranded RNA dependent activator        |
| <b>ELK1</b>                 | 28,3 | 28,5 | 27,2 | 27,5 | 18,9 | - | 0,1 | 1,0 | -1,9 | 1,0  | 0,44 | ELK1, member of ETS oncogene family                                                 |
| <b>HMGB1</b>                | 27,1 | 26,5 | 24,2 | 29,7 | 17,3 | - | 0,6 | 2,7 | 1,5  | -0,1 | 0,46 | High-mobility group box 1                                                           |
| <b>UBE2V1</b>               | 28,4 | 26,6 | 27,1 | 28,2 | 19,1 | - | 1,9 | 1,2 | -1,2 | 1,2  | 0,75 | Ubiquitin-conjugating enzyme E2 variant 1                                           |
| <b>UBE2N</b>                | 23,3 | 21,8 | 22,2 | 23,6 | 14,9 | - | 1,6 | 1,0 | -0,9 | 0,1  | 0,85 | Ubiquitin-conjugating enzyme E2N (UBC13 homolog, yeast)                             |
| <b>MAP3K1</b>               | 24,7 | 22,5 | 24,1 | 24,5 | 16,1 | - | 2,3 | 0,4 | -1,2 | 0,4  | 0,89 | Mitogen-activated protein kinase kinase kinase 1                                    |
| <b>HRAS</b>                 | 26,2 | 24,1 | 25,8 | 25,6 | 16,4 | - | 1,9 | 0,0 | -1,7 | -0,3 | 0,97 | V-Ha-ras Harvey rat sarcoma viral oncogene homolog                                  |
| <b>MAP3K7</b>               | 26,0 | 24,6 | 24,4 | 26,1 | 15,8 | - | 1,5 | 1,5 | -1,4 | -1,4 | 1,43 | Mitogen-activated protein kinase kinase kinase 7                                    |
| <b>NFkB RELATED SIGNALS</b> |      |      |      |      |      |   |     |     |      |      |      |                                                                                     |
| <b>IRF1</b>                 | 23,3 | 26,3 | 28,3 | 24,7 | 18,1 | - | 3,1 | 5,2 | 0,1  | 4,9  | 3,30 | Interferon regulatory factor 1                                                      |
| <b>NFKBIA</b>               | 24,2 | 24,0 | 26,1 | 28,2 | 18,4 | - | 0,0 | 2,3 | 3,1  | 4,7  | 2,53 | Nuclear factor of kappa light polypeptide gene enhancer in B-cells inhibitor, alpha |
| <b>REL</b>                  | 24,9 | 25,6 | 26,2 | 28,6 | 18,5 | - | 0,9 | 1,6 | 3,0  | 4,0  | 2,35 | V-rel reticuloendotheliosis viral oncogene homolog (avian)                          |
| <b>NFKB1</b>                | 24,8 | 25,3 | 26,2 | 27,6 | 18,2 | - | 0,4 | 1,6 | 1,5  | 3,5  | 1,74 | Nuclear factor of kappa light polypeptide gene enhancer in B-cells 1 (p105)         |
| <b>IRAK2</b>                | 22,3 | 23,0 | 24,0 | 25,0 | 15,8 | - | 0,8 | 2,0 | 1,5  | 2,4  | 1,65 | Interleukin-1 receptor-associated kinase 2                                          |
| <b>RELA</b>                 | 21,2 | 21,9 | 22,6 | 23,0 | 14,6 | - | 0,7 | 1,6 | 0,6  | 1,8  | 1,16 | V-rel reticuloendotheliosis viral oncogene homolog A                                |
| <b>NFKB2</b>                | 27,1 | 27,1 | 27,1 | 28,1 | 18,6 | - | 0,1 | 0,4 | 0,5  | 2,0  | 0,73 | Nuclear factor of kappa light polypeptide gene enhancer in B-cells 2 (p49/p100)     |
| <b>NFKBIL1</b>              | 21,7 | 21,5 | 21,7 | 23,3 | 15,3 | - | 0,2 | 0,2 | 0,4  | 2,2  | 0,61 | Nuclear factor of kappa light polypeptide gene enhancer in B-cells inhibitor-like 1 |
| <b>IRAK1</b>                | 22,7 | 22,2 | 23,1 | 23,2 | 15,8 | - | 0,6 | 0,6 | -0,9 | 2,0  | 0,26 | Interleukin-1 receptor-associated kinase 1                                          |
| <b>TBK1</b>                 | 26,4 | 26,5 | 25,9 | 26,3 | 18,0 | - | 0,2 | 0,2 | -1,3 | 1,8  | 0,11 | TANK-binding kinase 1                                                               |
| <b>CHUK</b>                 | 27,1 | 26,8 | 26,2 | 27,8 | 18,1 | - | 0,1 | 0,5 | -0,4 | 1,4  | 0,11 | Conserved helix-loop-helix ubiquitous kinase                                        |
| <b>IKBKB</b>                | 26,3 | 25,9 | 26,7 | 26,5 | 17,6 | - | 0,5 | 0,5 | -0,9 | 1,1  | 0,05 | Inhibitor of kappa light polypeptide gene enhancer in B-cells, kinase beta          |
| <b>IRF3</b>                 | 24,7 | 23,8 | 23,1 | 26,8 | 15,9 | - | 0,6 | 1,2 | 1,1  | 0,4  | 0,06 | Interferon regulatory factor 3                                                      |
| <b>NFRKB</b>                | 25,6 | 23,5 | 23,9 | 26,0 | 16,2 | - | 1,9 | 1,3 | -0,8 | -0,1 | 0,99 | Nuclear factor related to kappaB binding protein                                    |
| <b>HOUSE KEEPING GENES</b>  |      |      |      |      |      |   |     |     |      |      |      |                                                                                     |
| <b>B2M</b>                  | 17,2 | 17,3 | 19,0 | 19,9 | 19,9 | - | 2,5 | 3,5 | 1,5  | 5,0  | 3,11 | Beta-2-microglobulin                                                                |
| <b>HPRT1</b>                | 27,6 | 27,6 | 27,2 | 26,5 | 26,5 | - | 0,8 | 0,1 | 4,2  | 6,1  | 2,41 | Hypoxanthine phosphoribosyltransferase 1 (Lesch-Nyhan syndrome)                     |
| <b>RPL13A</b>               | 20,9 | 20,9 | 19,8 | 19,3 | 19,3 | - | 1,1 | 1,0 | 0,0  | 3,3  | 0,29 | Ribosomal protein L13a                                                              |
| <b>ACTB</b>                 | 15,0 | 15,3 | 15,3 | 15,0 | 14,7 | - | 0,0 | 0,0 | 0,0  | 0,0  | 0,00 | Actin, beta                                                                         |
| <b>GAPDH</b>                | 21,0 | 21,0 | 19,9 | 19,3 | 19,2 | - | 1,4 | 1,8 | -1,7 | 0,7  | 1,03 | Glyceraldehyde-3-phosphate dehydrogenase                                            |
